# Supplementary material for: Bacteriophage ΦSA012 Has a Broad Host Range against Staphylococcus aureus and Effective Lytic Capacity in a Mouse Mastitis Model
Source: PubMed Central journal article supplement (PMC5872034; doi:10.3390/biology7010008), 2018-01-09
Supplement: biology-07-00008-s001.pdf [file biology-07-00008-s001.pdf]

**Supplementary Materials**
**Table S1.** Genotype and antimicrobial resistance types of MRSA strains.

| No.             | SCC <sub>mec</sub> | MLST  | <i>spa</i> type | Antimicrobial resistance          |
|-----------------|--------------------|-------|-----------------|-----------------------------------|
| MRSA 2007-13    | II                 | NT    | t002            | MPIPC, GM, KM, EM, LCM, OTC, ERFX |
| MRSA 2007-28    | II                 | NT    | t1265           | MPIPC, KM, EM, LCM                |
| MRSA 2007-57    | IV                 | NT    | t008            | MPIPC, GM, KM, EM, LCM            |
| MRSA 2007-93    | II                 | NT    | t062            | MPIPC, KM, EM, LCM, OTC, CP, ERFX |
| MRSA VC39 Vet-1 | IV                 | ST30  | t021            | MPIPC, SM, KM, GM, EM             |
| MRSA VC50 Vet-1 | IV                 | ST380 | t1852           | MPIPC, KM, GM, EM, CPEX           |

NT indicates not tested. MPIPC; oxacillin, GM; gentamicin, KM; kanamycin, EM; erythromycin, LCM; lincomycin, OTC; oxytetracyclin, ERFX; enrofloxacin, CP; chloramphenicol SM; streptomycin, CPEX; ciprofloxacin
